# Supplementary material
Source: PubMed Central journal article supplement (PMC7438508)
Supplement: 41419_2020_2842_MOESM3_ESM.pdf [file 41419_2020_2842_MOESM3_ESM.pdf]

```

library(caret)

# Test all descriptors
swp = t(sapply(colnames(datr), function(nm) {
  c(
    h=wilcox.test(datr[which(cat==3), nm], datr[which(cat==1), nm])$p.value,
    b=wilcox.test(datr[which(cat==2), nm], datr[which(cat==1), nm])$p.value
  )
}))

# Keep relevant descriptors
pt = 0.0125 #p-value threshold
hbp = rownames(swp)[which(swp[, 'b']>pt & swp[, 'h']<pt)]

# Create binary category
cat2 = cat; cat2[which(cat2==2)]=1

# Supersampling for unbalanced data
sm = SMOTE(cat ~ ., data = data.frame(cat=as.factor(cat2), datr[, hbp]))

# Create random forest model
set.seed(123)
mod = train(cat~., data=sm, method='rf', classwt=c(1, 5))$finalModel

# Predict original dataset to get confusion matrix
predv = predict(mod, datr[, hbp]); conf=confusionMatrix(data = predv, reference
= as.factor(cat2))

```
